# Supplementary material
Source: PubMed Central journal article supplement (PMC5817765)
Supplement: tpmd170251.SD1.pdf [file tpmd170251.SD1.pdf]

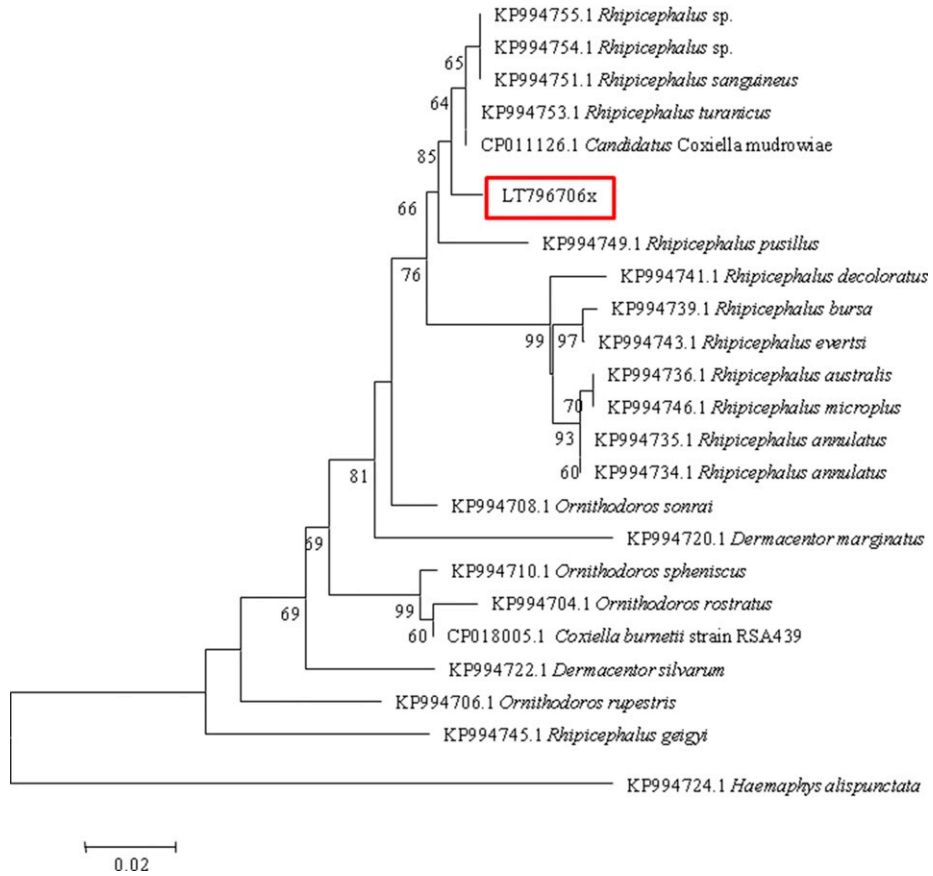

SUPPLEMENTAL FIGURE 1. Neighbor-joining phylogenetic tree based on 23S ribosomal RNA gene sequences including *Coxiella*-like strains of ticks.
